# Supplementary material for: From Clinical Criteria to AI-Based Classification of Advanced Parkinson’s Disease: A Data-Driven Approach Using Structured PPMI Data
Source: Research Square preprint supplement (doi:10.21203/rs.3.rs-7745559/v1), 2025-10-13
Supplement: Supplementary file 1 [file cf65e4a08f72ca9b3a90141f.docx]

Suppl. Table 1: Demographic and clinical data of participants in the PPMI study (year 7)

|  | **NAs %** | **All patients** | **Definitive APD**  (Def) | **Probable APD**  (Pro) | **Possible APD**  (Pos) | **Not APD**  (Not) | **Statistic** | **Group differences** |
| --- | --- | --- | --- | --- | --- | --- | --- | --- |
| N | — | 396 | 108 (27%) | 143 (36.1%) | 79 (19.9%) | 69 (17.4%) | — |  |
| Genetically confirmed PD, n (%) † | 0 | 136 (34.3) | 71 (52.2) | 41 (30.1) | 16 (11.7) | 8 (5.9) |  |  |
| Monitoring time, years | 0 | 9.2 (2.5 | 6.6 (2.6 | 9.7 (1.8 | 10.3 (1.5 | 10.6 (1.2 | 85.1*** | Def-Not***  Def-Pos***  Def-Pro***  Not-Pro** |
| Age, years | 0 | 61 (9.4) | 62.4 (10.6) | 60.8 (9.2) | 61.9 (7.7) | 58.5 (9.0) | 2.8* | Def-Not* |
| Males, n (%) | 0 | 247 (62.4) | 61 (25.7) | 86 (21.7) | 54 (13.6) | 46 (11.6) | — |  |
| Disease duration, years (mean (min, max)) | 2.1 | 2.4 (0, 20) | 4.6 (0, 20) | 2.6 (0, 12) | 0.9 (0, 2) | 0.8 (0, 2) | 49.5*** | Def-Not***  Def-Pos***  Def-Pro***  Not-Pro***  Pos-Pro*** |
| LEDD | 0.2 | 150.8  (301.5) | 308.4 (384.1) | 132.4 (283.9) | 70.7 (226.0) | 44.3 (139.2) | 15.9*** | Def-Not***  Def-Prob***  Def-Pos*** |
| H&Y, median (IQR) | 0 | 2 (1) | 2 (0) | 2 (1) | 2 (1) | 1 (1) | 21.8** | Def-Not***  Def-Pos** |
| MDS-UPDRS-I Questionnaire | 0.1 | 4.7 (3.5) | 6.7 (3.7) | 4.8 (3.5) | 3.7 (2.6) | 2.7 (2.1) | 24.2*** | Def-Not***  Def-Pos***  Def-Pro***  Not-Pro*** |
| MDS-UPDRS-I EDL | 0.2 | 1.5 (1.9) | 2.6 (2.5) | 1.4 (1.6) | 1.2 (1.5) | 0.5 (1.0) | 20.33*** | Def-Not***  Def-Pos***  Def-Pro***  Not-Pro** |
| MDS-UPDRS-II | 0.1 | 6.7 (5.2) | 10 (6.5) | 6.5 (4.4) | 5.2 (3.4) | 3.7 (2.6) | 30.1*** | Def-Not***  Def-Pos***  Def-Pro***  Not-Pro*** |
| MDS-UPDRS-III | 0 | 20 (9.4) | 22 (11.3) | 20.4 (8.5) | 19.6 (8.4) | 16.7 (8.1) | 4.7** | Def-Not **  Not-Pro* |
| MDS-UPDRS-IV | 21.1 | 1.9 (2.6) | 2.7 (2.9) | 0.8 (1.8) | 0.2 (0.6) | 1 (2.0) | 6.5*** | Def-Pro**  Def-Pos* |
| MoCA | 1.7 | 26.8 (2.9) | 25.9 (4.0) | 26.9 (2.5) | 26.9 (2.3) | 27.8 (2.3) | 5.9*** | Def-Not*** |

Supplementary Table 1. Demographic and clinical data of participants in the PPMI study at year 7. *p<.05, **p<.01, ***p<.001. Note: Variables are grouped by domain, and baseline values are presented as mean (standard deviation) for continuous variables and percentages for categorical variables. Abbreviations: APD = Advanced Parkinson’s Disease; MDS-UPDRS = Movement Disorder Society-Unified Parkinson’s Disease Rating Scale; EDL = Experiences of Daily Living; MoCA = Montreal Cognitive Assessment; H&Y = Hoehn and Yahr Stage. The “Statistic” column reports the t-value for all comparisons, except for H&Y, where the U-value from Wilcoxon test was used. †Among the 136 participants with genetically confirmed PD, the most frequent mutations were LRRK2 (n = 74), GBA (n = 40), SNCA (n = 13), PARKIN (n = 5), PINK1 (n = 1), and combined LRRK2 + GBA (n = 3

|  | **Y0** | **Y1** | **Y2** | **Y3** | **Y4** | **Y5** | **Y6** | **Y7** | **Y8** | **Y9** | **Y10** | **Y11** | **Y12** | **Y13** |
| --- | --- | --- | --- | --- | --- | --- | --- | --- | --- | --- | --- | --- | --- | --- |
| Participants per visit | 1302 | 775 | 634 | 580 | 543 | 498 | 435 | 396 | 362 | 338 | 321 | 293 | 244 | 224 |
| Withdrawals since previous visit | 0 | 527 | 141 | 54 | 37 | 45 | 63 | 39 | 34 | 24 | 17 | 28 | 49 | 20 |
| % Withdrawals from previous visit | 0 | 40.5 | 18.2 | 8.5 | 6.4 | 9.0 | 14.4 | 9.0 | 8.6 | 6.6 | 5.0 | 8.7 | 16.7 | 8.2 |
| Withdrawals with documented cause | 0 | 34 | 47 | 42 | 19 | 45 | 26 | 38 | 34 | 21 | 10 | 13 | 18 | 20 |
| % of withdrawals with documented cause | 0 | 6.5 | 33.3 | 77.8 | 51.4 | 100.0 | 41.3 | 97.4 | 100.0 | 87.5 | 58.8 | 46.4 | 36.7 | 100 |
| Due to adverse event | 0 | 3 | 1 | 0 | 0 | 0 | 0 | 0 | 0 | 0 | 0 | 0 | 1 | 0 |
| Due to death | 0 | 3 | 5 | 7 | 4 | 10 | 6 | 10 | 6 | 9 | 4 | 5 | 8 | 13 |
| Due to family or social issues | 0 | 3 | 4 | 4 | 2 | 5 | 3 | 4 | 2 | 1 | 1 | 0 | 0 | 0 |
| Lost to follow-up | 0 | 1 | 8 | 9 | 2 | 8 | 2 | 5 | 5 | 3 | 1 | 3 | 1 | 2 |
| Due to protocol non-compliance | 0 | 4 | 1 | 1 | 0 | 1 | 0 | 1 | 1 | 0 | 0 | 0 | 1 | 0 |
| Due to travel issues | 0 | 1 | 8 | 4 | 5 | 5 | 5 | 6 | 4 | 1 | 1 | 3 | 2 | 0 |
| Due to burden of study procedures | 0 | 7 | 9 | 8 | 1 | 1 | 0 | 1 | 3 | 1 | 1 | 1 | 1 | 1 |
| Due to PD-related disability | 0 | 4 | 3 | 3 | 2 | 6 | 3 | 4 | 3 | 3 | 2 | 1 | 2 | 4 |
| Due to site closure | 0 | 0 | 0 | 0 | 0 | 2 | 2 | 0 | 0 | 0 | 0 | 0 | 0 | 0 |
| Due to general disinterest | 0 | 7 | 5 | 6 | 1 | 6 | 5 | 7 | 8 | 3 | 0 | 0 | 2 | 0 |
| Other | 0 | 1 | 3 | 0 | 2 | 1 | 0 | 0 | 2 | 0 | 0 | 0 | 0 | 0 |

Suppl. Table 2. Participant Retention and Causes of Withdrawal Across the 13-Year Follow-Up Period

This table summarizes the number of participants completing each scheduled visit (Y0 to Y13), the absolute and relative number of withdrawals between visits, and the causes of withdrawal when documented. The percentage of withdrawals with a documented reason varied across visits, ranging from 6.5% to 100 % relative to total dropouts. The most frequent causes of discontinuation were death, general disinterest, and burden of study procedures. Notably, the proportion of missing reasons was highest in early visits and progressively decreased over time, especially from Year 7 onwards.
